# Supplementary material for: Identification of a Novel CD8+ T cell exhaustion-related gene signature for predicting survival in hepatocellular carcinoma
Source: Springer Nature journal article supplement (doi:10.1186/s12885-023-11648-x), 2023-12-04

**Figure 8. Expression of *STAM*, *ANXA5* and *MAD2L2* in HCC cell lines.**(A) The expressions of *STAM*, *ANXA5* and *MAD2L2* in normal hepatocytes and hepatoma cell lines were detected using Western blotting. Knocking down *STAM*, *ANXA5* and *MAD2L2* inhibited the proliferation and migration of HCC cells.

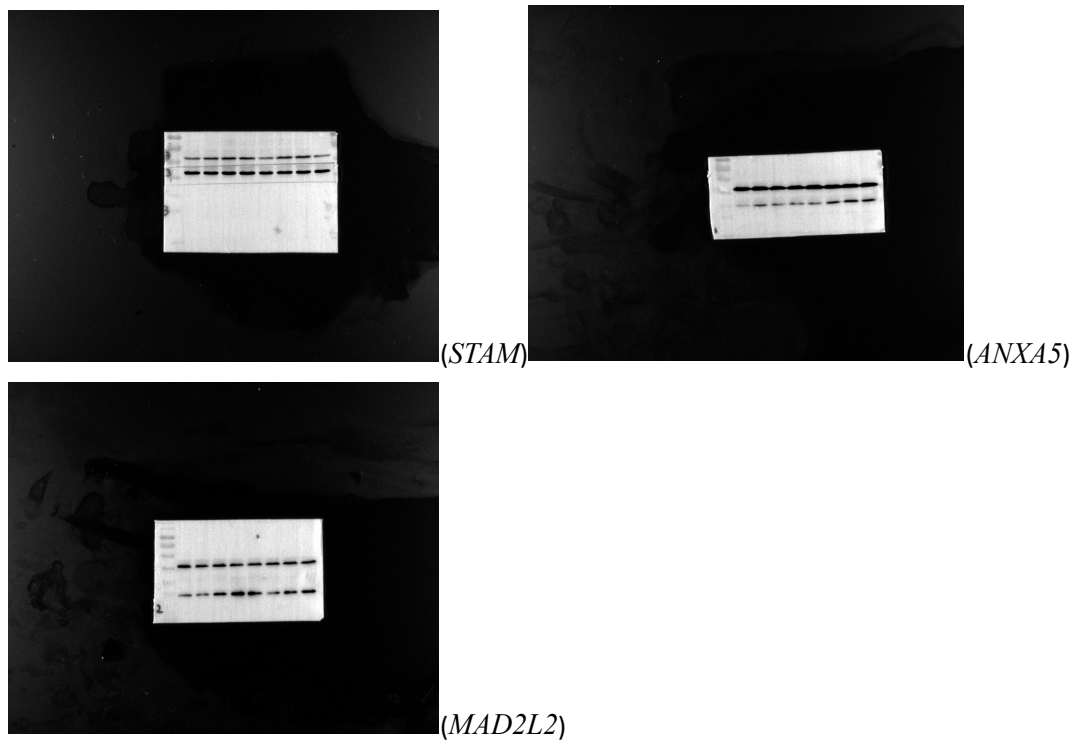

(B) The knockdown efficiency of *STAM*, *ANXA5* and *MAD2L2* was detected using Western Blotting.

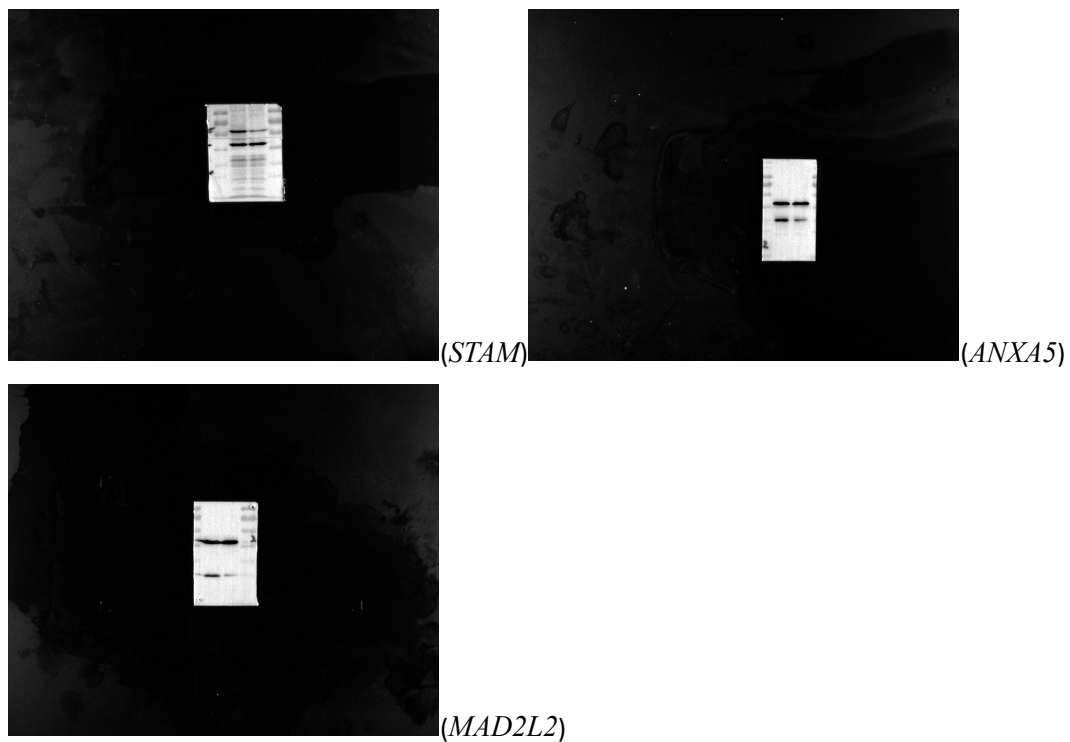

Supplement: MOESM1 [file 26490912]
