# Supplementary material for: Identification of a Novel CD8+ T cell exhaustion-related gene signature for predicting survival in hepatocellular carcinoma
Source: BMC Cancer. 2023 Dec 4;23:1185. doi: 10.1186/s12885-023-11648-x (PMC10694949; doi:10.1186/s12885-023-11648-x)
Supplement: Supplementary file 4 — Additional file 4: Table 3. Drugs with signifcant diferences in IC50 values between high-risk and low-risk groups. [file 12885_2023_11648_MOESM4_ESM.xlsx]

## Sheet: Sheet1
Drug names	P value
A.443654	<2.22E-16
A.770041	1.6e-12
ABT.263	7.4e-08
ABT.888	< 2.22E-16
AG.014699	< 2.22E-16
AICAR	< 2.22E-16
AKT.inhibitor.Vlll	6.2e-14
AMG.706	< 2.22E-16
AP.24534	5.2e-06
AS601245	0.00032
ATRA	4e-15
AUY922	< 2.22E-16
Axitinib	5.4e-14
AZ628	0.0029
AZD.0530	< 2.22E-16
AZD.2281	0.029
AZD6244	< 2.22E-16
AZD6482	5e-08
AZD8055	< 2.22E-16
BAY.61.3606	8.1e-11
Bexarotene	< 2.22E-16
Bl.2536	< 2.22E-16
Bl.D1870	< 2.22E-16
BIBW2992	0.00068
Bicalutamide	2e-09
BIRB.0796	< 2.22E-16
Bleomycin	< 2.22E-16
BMS.509744	7e-10
BMS.536924	0.00028
BMS.754807	< 2.22E-16
Bortezomib	0.00014
Bryostatin.1	1.3e-09
BX.795	< 2.22E-16
CCT007093	2.1e-08
CCT018159	9.6e-13
CEP.701	0.0012
CGP.60474	3.1e-06
CGP.082996	< 2.22E-16
CHIR.99021	4.3e-11
Cl.1040	2.3e-07
CMK	2.3e-12
Cyclopamine	< 2.22E-16
Dasatinib	2.9e-13
DMOG	< 2.22E-16
Docetaxel	1.7e-07
Doxorubicin	< 2.22E-16
EHT.1864	< 2.22E-16
Elesclomol	6.5e-10
Embelin	< 2.22E-16
Epothilone.B	< 2.22E-16
Erlotinib	< 2.22E-16
